# Supplementary material
Source: MDPI journal article supplement (https://www.mdpi.com/1999-4907/9/2/71)
Supplement: s1 [file s1]

Supplementary Material:

Table S1. Analysis of survival in the drought experiment for the three species.

| **Effect** | **df** | **Wald Chi-Square** | **Pr > ChiSq** |
| --- | --- | --- | --- |
| W1 | 1 | 44.107 | <0.0001 |
| S2 | 2 | 12.1902 | 0.0023 |
| P(S)3 | 14 | 11.4100 | 0.6536 |

1Watering. 2Species. 3Population within species.

Table S2. Values of survival and ontogenic stages recorded per population.

| **Code1** | **W2** | **Survival (%)3** | |  | **Ontogenic score4 (B, %)** | | | | | | |  | **Ontogenic score (E, %)** | | | | | | |
| --- | --- | --- | --- | --- | --- | --- | --- | --- | --- | --- | --- | --- | --- | --- | --- | --- | --- | --- | --- |
|  |  | B | E |  | 7 | 6 | 5 | 4 | 3 | 2 | 1 |  | 7 | 6 | 5 | 4 | 3 | 2 | 1 | |
| OC01 | FC | 100 | 100 |  | 0 | 4 | 0 | 16 | 44 | 32 | 4 |  | 0 | 46 | 0 | 50 | 4 | 0 | 0 | |
|  | DS | 100 | 60 |  | 0 | 0 | 0 | 0 | 84 | 16 | 0 |  | 0 | 60 | 0 | 40 | 0 | 0 | 0 | |
| OC02 | FC | 100 | 100 |  | 0 | 0 | 0 | 12 | 64 | 24 | 0 |  | 4 | 64 | 0 | 32 | 0 | 0 | 0 | |
|  | DS | 80 | 60 |  | 0 | 0 | 0 | 12 | 60 | 24 | 4 |  | 0 | 63 | 0 | 37 | 0 | 0 | 0 | |
| *Mean* | *FC* | *100* | *100* |  | *0* | *2* | *0* | *14* | *54* | *28* | *2* |  | *2* | *55* | *0* | *41* | *2* | *0* | *0* | |
| *Mean* | *DS* | *90* | *60* |  | *0* | *0* | *0* | *6* | *72* | *20* | *2* |  | *0* | *62* | *0* | *38* | *0* | *0* | *0* | |
| PA01 | FC | 100 | 100 |  | 0 | 0 | 0 | 0 | 29 | 71 | 0 |  | 50 | 50 | 0 | 0 | 0 | 0 | 0 | |
|  | DS | 100 | 80 |  | 0 | 4 | 0 | 0 | 21 | 71 | 4 |  | 38 | 62 | 0 | 0 | 0 | 0 | 0 | |
| PA02 | FC | 80 | 80 |  | 0 | 0 | 0 | 0 | 6 | 94 | 0 |  | 25 | 75 | 0 | 0 | 0 | 0 | 0 | |
|  | DS | 60 | 40 |  | 0 | 0 | 0 | 0 | 0 | 100 | 0 |  | 27 | 73 | 0 | 0 | 0 | 0 | 0 | |
| PA03 | FC | 80 | 80 |  | 0 | 0 | 0 | 4 | 26 | 70 | 0 |  | 48 | 52 | 0 | 0 | 0 | 0 | 0 | |
|  | DS | 80 | 60 |  | 0 | 0 | 0 | 0 | 29 | 71 | 0 |  | 35 | 65 | 0 | 0 | 0 | 0 | 0 | |
| PA04 | FC | 60 | 60 |  | 0 | 5 | 0 | 0 | 23 | 73 | 0 |  | 73 | 27 | 0 | 0 | 0 | 0 | 0 | |
|  | DS | 60 | 40 |  | 0 | 4 | 0 | 0 | 29 | 67 | 0 |  | 47 | 53 | 0 | 0 | 0 | 0 | 0 | |
| PA06 | FC | 100 | 100 |  | 0 | 0 | 0 | 0 | 24 | 76 | 0 |  | 68 | 32 | 0 | 0 | 0 | 0 | 0 | |
|  | DS | 100 | 80 |  | 0 | 0 | 0 | 0 | 13 | 88 | 0 |  | 42 | 58 | 0 | 0 | 0 | 0 | 0 | |
| PA07 | FC | 40 | 40 |  | 0 | 0 | 0 | 0 | 42 | 58 | 0 |  | 50 | 50 | 0 | 0 | 0 | 0 | 0 | |
|  | DS | 60 | 60 |  | 0 | 0 | 0 | 0 | 25 | 75 | 0 |  | 40 | 60 | 0 | 0 | 0 | 0 | 0 | |
| PA08 | FC | 60 | 60 |  | 0 | 0 | 0 | 0 | 0 | 87 | 13 |  | 7 | 93 | 0 | 0 | 0 | 0 | 0 | |
|  | DS | 60 | 60 |  | 0 | 0 | 0 | 0 | 0 | 100 | 0 |  | 14 | 86 | 0 | 0 | 0 | 0 | 0 | |
| PA09 | FC | 100 | 100 |  | 0 | 0 | 0 | 0 | 16 | 84 | 0 |  | 40 | 60 | 0 | 0 | 0 | 0 | 0 | |
|  | DS | 100 | 80 |  | 0 | 4 | 0 | 0 | 40 | 56 | 0 |  | 74 | 26 | 0 | 0 | 0 | 0 | 0 | |
| PA11 | FC | 100 | 100 |  | 0 | 0 | 0 | 0 | 4 | 96 | 0 |  | 21 | 79 | 0 | 0 | 0 | 0 | 0 | |
|  | DS | 100 | 100 |  | 0 | 0 | 0 | 0 | 12 | 88 | 0 |  | 21 | 79 | 0 | 0 | 0 | 0 | 0 | |
| PA12 | FC | 100 | 100 |  | 0 | 0 | 0 | 4 | 36 | 60 | 0 |  | 48 | 52 | 0 | 0 | 0 | 0 | 0 | |
|  | DS | 100 | 100 |  | 0 | 0 | 0 | 4 | 40 | 52 | 4 |  | 13 | 88 | 0 | 0 | 0 | 0 | 0 | |
| *Mean* | *FC* | *82* | *82* |  | *0* | *0* | *0* | *1* | *21* | *77* | *1* |  | *43* | *57* | *0* | *0* | *0* | *0* | *0* | |
| *Mean* | *DS* | *82* | *70* |  | *0* | *1* | *0* | *0* | *21* | *77* | *1* |  | *35* | *65* | *0* | *0* | *0* | *0* | *0* | |
| PS01 | FC | 100 | 100 |  | 0 | 43 | 0 | 0 | 4 | 48 | 4 |  | 63 | 33 | 0 | 0 | 4 | 0 | 0 | |
|  | DS | 80 | 80 |  | 0 | 38 | 0 | 0 | 8 | 54 | 0 |  | 77 | 23 | 0 | 0 | 0 | 0 | 0 | |
| PS02 | FC | 100 | 100 |  | 0 | 40 | 0 | 0 | 0 | 56 | 4 |  | 67 | 33 | 0 | 0 | 0 | 0 | 0 | |
|  | DS | 100 | 100 |  | 0 | 20 | 0 | 0 | 0 | 80 | 0 |  | 86 | 14 | 0 | 0 | 0 | 0 | 0 | |
| PS03 | FC | 100 | 100 |  | 0 | 46 | 0 | 0 | 29 | 25 | 0 |  | 8 | 92 | 0 | 0 | 0 | 0 | 0 | |
|  | DS | 80 | 60 |  | 0 | 79 | 0 | 0 | 0 | 17 | 4 |  | 25 | 75 | 0 | 0 | 0 | 0 | 0 | |
| PS04 | FC | 100 | 100 |  | 0 | 24 | 0 | 0 | 16 | 60 | 0 |  | 20 | 76 | 0 | 4 | 0 | 0 | 0 | |
|  | DS | 80 | 80 |  | 0 | 29 | 0 | 0 | 4 | 67 | 0 |  | 46 | 50 | 0 | 0 | 4 | 0 | 0 | |
| PS05 | FC | 100 | 100 |  | 0 | 4 | 0 | 0 | 32 | 64 | 0 |  | 32 | 68 | 0 | 0 | 0 | 0 | 0 | |
|  | DS | 100 | 100 |  | 0 | 4 | 0 | 0 | 24 | 68 | 4 |  | 39 | 61 | 0 | 0 | 0 | 0 | 0 | |
| *Mean* | *FC* | *100* | *100* |  | *0* | *31* | *0* | *0* | *16* | *51* | *2* |  | *38* | *61* | *0* | *1* | *1* | *0* | *0* | |
| *Mean* | *DS* | *88* | *84* |  | *0* | *34* | *0* | *0* | *7* | *57* | *2* |  | *55* | *44* | *0* | *0* | *1* | *0* | *0* | |

1 OC: *P. oocarpa*; PA: *P. patula*, PS: *P. pseudostrobus*. 2 W: Watering regime; FC: Field capacity; DS: Drought stress; 3 B: Beginning of the experiment; E: End of the experiment. 4 Ontogenic score following [16] .

Table S3. Mean (± standard errors) for growth variables and biomass fractions for the two watering treatments (FC / DS).

|  | **HG** | **RDM** | **SDM** | **NDM** | **TM** | **RMF** | **SMF** | **NMF** | **SLA** |
| --- | --- | --- | --- | --- | --- | --- | --- | --- | --- |
| *P. oocarpa* |  |  |  |  |  |  |  |  |  |
| OC01 | 120.04±9.81a* / 36.60 ±4.03a | 446.55 ±50.01b / 338.65 ±55.05a | 376.52 ±49.56b / 286.09 ±27.98a | 1,110.15 ±151.84b / 989.81 ±85.96a | 1,933.51 ±246.12b / 1,613.99 ±140.12a | 0.24±0.01a / 0.20±0.03a | 0.18 ±0.01b / 0.18 ±0.02a | 0.58 ±0.01a / 0.62 ±0.02a | 153.93 ±12.72a / 156.44 ±0.00a* |
| OC02 | 133.60±8.89a* / 30.11 ±2.31a | 580.22 ±49.64a* / 331.46 ±51.68a | 538.97 ±49.23a* / 235.46 ±25.91a | 1,414.58 ±150.89a* / 896.92 ±81.86a | 2,533.68 ±244.73a* / 1,463.78 ±132.31a | 0.23±0.01a / 0.23±0.03a | 0.21 ±0.01a* / 0.16 ±0.01a | 0.56 ±0.01a / 0.61 ±0.02a | 151.12 ±0.00b* / 121.90 ±0.00b |
| *P. patula* |  |  |  |  |  |  |  |  |  |
| PA01 | 141.71±8.80ab* / 56.33 ±4.44a | 311.30 ±32.42a / 210.84 ±25.45a | 261.36 ±20.80abc* / 118.83 ±10.79a | 802.41 ±68.88ab / 626.16 ±51.30a | 1,374.89 ±114.49ab* / 954.78 ±76.14a | 0.22 ±0.01a / 0.22 ±0.02a | 0.20 ±0.01a* / 0.12 ±0.01b | 0.58 ±0.01ab / 0.66 ±0.02a* | 222.90 ±8.90a / 176.34 ±6.83ab |
| PA02 | 151.38±11.02ab* / 61.82 ±5.11a | 284.38 ±35.26a / 205.72 ±29.12a | 266.35 ±24.40abc* / 130.36 ±13.46a | 722.23 ±74.43ab / 613.03 ±59.53a | 1,273.71 ±124.27ab / 940.79 ±87.50a | 0.22 ±0.01a / 0.22 ±0.03a | 0.21 ±0.01a* / 0.14 ±0.01ab | 0.57 ±0.01b / 0.66 ±0.02a | 232.53 ±10.79a* / 184.98 ±8.20ab |
| PA03 | 157.83±9.10ab* / 56.71 ±4.60a | 301.97 ±32.71a / 250.33 ±26.30a | 286.59 ±21.17ab* / 141.02 ±11.56a | 817.68 ±69.43ab / 729.42 ±53.62a | 1,405.78 ±115.47ab / 1,117.95 ±79.35a | 0.21 ±0.01a / 0.23 ±0.02a | 0.21 ±0.01a* / 0.12 ±0.01b | 0.59 ±0.01ab / 0.65 ±0.02a* | 220.02 ±9.05a* / 162.53 ±7.08b |
| PA04 | 138.91±7.49ab* / 56.29 ±4.19a | 303.37 ±33.09a* / 206.02 ±26.31a | 258.89 ±21.66abc* / 125.41 ±11.57a | 823.56 ±70.17ab / 684.82 ±53.64a | 1,384.76 ±116.77ab* / 1,014.60 ±79.37a | 0.21 ±0.01a / 0.21 ±0.02a | 0.19 ±0.01a* / 0.12 ±0.01b | 0.60 ±0.01ab / 0.67 ±0.02a* | 226.08 ±9.26a* / 169.54 ±7.23ab |
| PA06 | 177.60±7.92a* / 57.53 ±4.86a | 326.10 ±32.24a* / 211.41 ±25.69a | 338.37 ±20.55a* / 130.00 ±11.01a | 906.70 ±68.51a* / 643.68 ±51.95a | 1,570.91 ±113.85a* / 983.56 ±77.04a | 0.21 ±0.01a / 0.22 ±0.02a | 0.22 ±0.01a* / 0.13 ±0.01b | 0.58 ±0.01b / 0.65 ±0.02a* | 204.39 ±8.77a / 173.70 ±6.83ab |
| PA07 | 154.33±11.87ab* / 79.00 ±8.03a | 294.24 ±37.73a / 187.86 ±29.77a | 266.47 ±27.36abc / 155.46 ±14.49a | 758.83 ±79.29ab / 627.36 ±62.84a | 1,319.76 ±132.79ab / 971.89 ±92.12a | 0.21 ±0.01a / 0.19 ±0.03a | 0.21 ±0.01a / 0.19 ±0.01a | 0.59 ±0.01ab / 0.62 ±0.02a | 215.29 ±13.48a / 176.09 ±8.44ab |
| PA08 | 104.67±10.36c* / 73.14 ±5.03a | 253.21 ±36.55a / 190.61 ±27.64a | 187.26 ±25.97c / 126.85 ±12.73a | 633.35 ±76.98b / 600.52 ±57.22a | 1,075.00 ±128.74b / 920.84 ±84.29a | 0.20 ±0.01a / 0.21 ±0.03a | 0.17 ±0.01a* / 0.14 ±0.01ab | 0.63 ±0.01a / 0.65 ±0.02a | 226.52 ±13.78a / 194.49 ±7.63a |
| PA09 | 146.96±6.89ab* / 66.47 ±3.69a | 266.93 ±32.21a / 228.05 ±25.73a | 252.69 ±20.51bc* / 160.19 ±11.32a | 735.45 ±68.46ab / 705.17 ±52.89a | 1,255.25 ±113.76b / 1,060.48 ±77.21a | 0.21 ±0.01a / 0.26 ±0.02a | 0.20 ±0.01a* / 0.14 ±0.01ab | 0.59 ±0.01ab / 0.64 ±0.02a | 231.03 ±9.06a* / 177.54 ±6.97ab |
| PA11 | 161.04±8.45ab* / 64.74 ±4.19a | 278.36 ±32.59a / 242.23 ±25.76a | 261.12 ±21.01abc* / 131.75 ±11.07a | 721.88 ±69.20b / 657.69 ±52.15a | 1,261.79 ±115.07b / 1,033.13 ±77.30a | 0.22 ±0.01a / 0.23 ±0.02a | 0.21 ±0.01a* / 0.13 ±0.01b | 0.58 ±0.01b / 0.64 ±0.02a | 237.60 ±9.65a* / 188.85 ±7.13a |
| PA12 | 158.48±7.20ab* / 59.56 ±6.36a | 297.54 ±32.77a / 248.33 ±26.90a | 249.46 ±21.25bc* / 122.17 ±12.09a | 710.31 ±69.55b / 633.86 ±55.23a | 1,256.38 ±115.68b / 1,003.03 ±81.58a | 0.22 ±0.01a / 0.24 ±0.02a | 0.20 ±0.01a* / 0.13 ±0.01ab | 0.58 ±0.01b / 0.64 ±0.02a* | 237.52 ±9.15a* / 192.17 ±7.49a |
| *P. pseudostrobus* | |  |  |  |  |  |  |  |  |
| PS01 | 112.13±9.46a* / 43.45 ±5.48ab | 210.20 ±24.82ab / 174.76 ±22.73b / | 177.73 ±22.53a* / 119.95 ±14.05a | 817.94 ±83.78b / 781.29 ±79.29ab | 1,204.03 ±117.30b / 1,075.33 ±103.47a | 0.16 ±0.01b / 0.18 ±0.01b | 0.15 ±0.01a* / 0.11 ±0.01a | 0.69 ±0.02ab / 0.72 ±0.02ab* | 200.84 ±8.27a* / 165.66 ±5.84ab |
| P202 | 104.92±11.31a* / 51.41 ±6.09a | 211.24 ±23.68ab / 241.32 ±21.28ab | 194.61 ±21.73a / 137.12 ±13.34a | 859.44 ±80.64b / 874.47 ±76.17ab | 1,265.07 ±112.98b / 1,253.17 ±99.18a | 0.15 ±0.01b / 0.19 ±0.01ab | 0.14 ±0.01a* / 0.11 ±0.01a | 0.70 ±0.02ab / 0.70 ±0.01ab | 192.60 ±7.64a* / 151.10 ±5.44bC |
| PS03 | 28.40±7.38b* / 8.65 ±2.43c | 305.76 ±25.24a / 238.13 ±22.93ab | 172.54 ±22.47a / 102.31 ±14.16a | 1,219.94 ±83.55a / 916.07 ±79.76a | 1,689.83 ±116.98a / 1,256.34 ±104.10a | 0.17 ±0.01b / 0.18 ±0.01ab | 0.08 ±0.01b / 0.07 ±0.01b | 0.76 ±0.02a / 0.75 ±0.02a | 149.81 ±8.49b / 133.55 ±6.03C |
| PS04 | 88.88±6.87a* / 31.78 ±3.04b | 289.91 ±23.18ab / 278.05 ±21.19a | 159.27 ±21.38a / 120.49 ±13.29a | 785.11 ±79.30b / 849.47 ±75.94ab | 1,233.41 ±111.13b / 1,248.58 ±98.86a | 0.24 ±0.01a / 0.23 ±0.01a | 0.12 ±0.01ab / 0.09 ±0.01ab | 0.64 ±0.02b / 0.68 ±0.01b | 195.13 ±9.19a* / 132.03 ±5.72C |
| PS05 | 102.64±8.87a* / 39.48 ±3.15ab | 205.38 ±23.21b / 221.16 ±20.78ab | 193.48 ±21.40a* / 103.25 ±13.09a | 786.90 ±79.38b / 685.46 ±75.06b | 1,184.88 ±111.24b / 1,010.25 ±97.65a | 0.16 ±0.01b / 0.22 ±0.01ab* | 0.16 ±0.01a* / 0.10 ±0.01ab | 0.68 ±0.02b / 0.68 ±0.01b | 208.71 ±10.82a / 176.11 ±5.78a |

HG: height growth increment (mm); RDM: root dry mass (mg); SDM: stem dry mass (mg); NDM: needles dry mass (mg); TDM: total dry mass (mg); RMF: root mass fraction (g g-1); SMF: stem mass fraction (g g-1) NMF: needles mass fraction (g g-1); SLA: specific leaf area (cm2/g). Different letters indicate statistical differences for provenance and asterisk indicate statistical differences for treatment (both at *p*<0.05).

Table S4. Analysis of unequal slope and intercept estimated among watering regimes by species.

| **Effect** | **Ndf** | **Ddf** | **F** | **P** |
| --- | --- | --- | --- | --- |
| *P. oocarpa* |  |  |  |  |
| Intercept | 2 | 79 | 1.08 | 0.344 |
| Slope | 2 | 79 | 83.32 | <0.0001 |
| *P. patula* |  |  |  |  |
| Intercept | 2 | 370 | 53.99 | <0.0001 |
| Slope | 2 | 370 | 480.54 | <0.0001 |
| *P. pseudostrobus* |  |  |  |  |
| Intercept | 2 | 228 | 16.29 | <0.0001 |
| Slope | 2 | 228 | 193.96 | <0.0001 |

Ndf: numerator degree of freedom; Ddf: denominator degree of freedom; F: F-value; P: p-value

Table S5. Percentage of the total variance explained by components and weights of the variables.

| **Variables** | **Principal components** | |
| --- | --- | --- |
| **PC1 (59.85%)** | **PC2 (26.24%)** |
| **HG**  **RDM**  **SDM**  **SMF**  **SLA** | 0.82768  -0.06602 0.42444 0.87379 0.69885 | 0.31010 0.84983 0.90545 0.29773  -0.17294 |


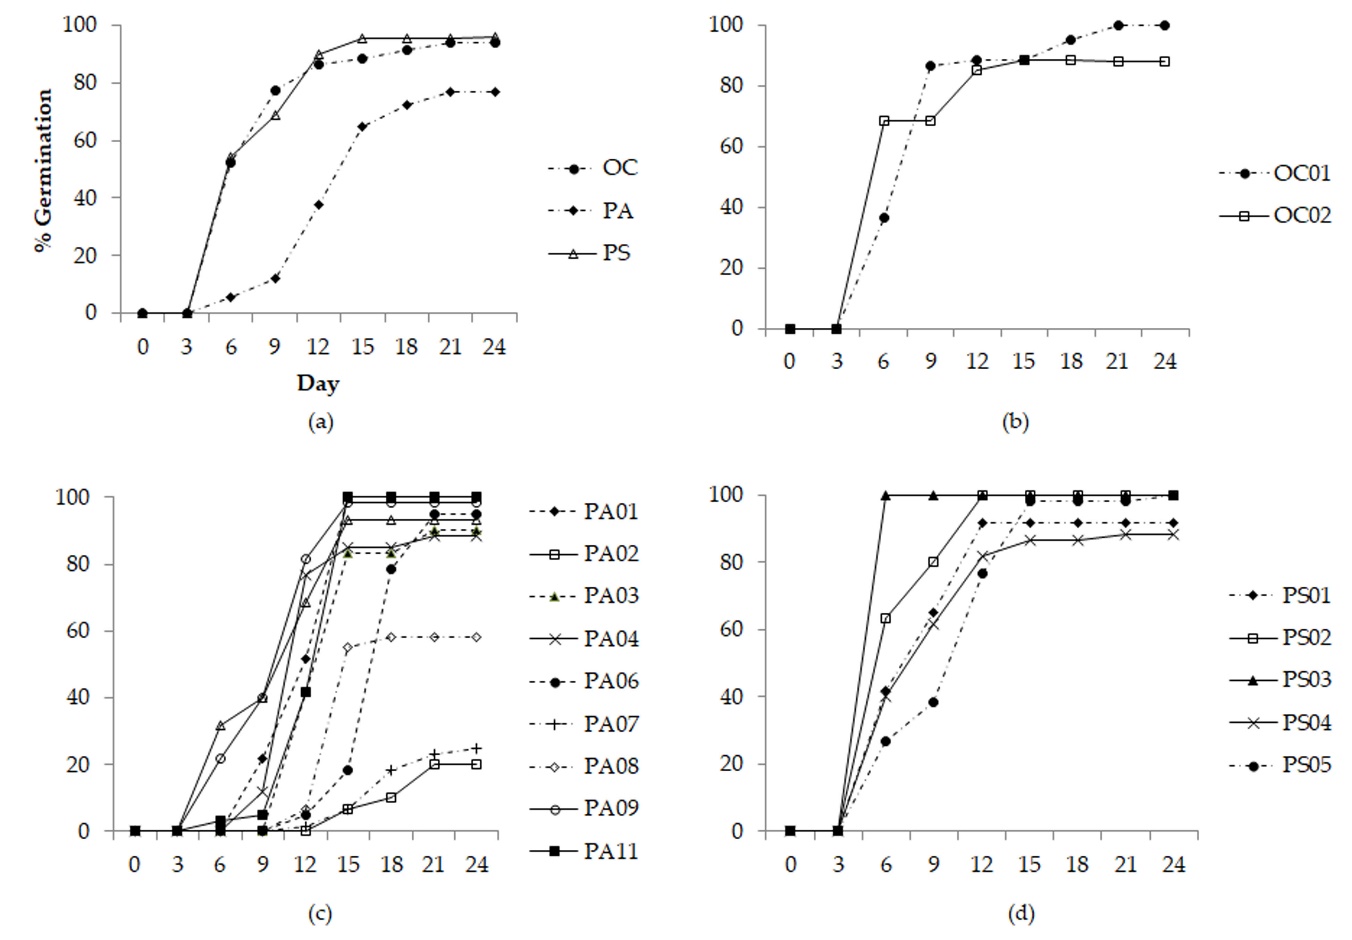


**Figure S1**. Germination speeds for *P. oocarpa* (OC), *P. patula* (PA) and *P. pseudostrobus* (PS) (a) and among their populations (OC01-02 (b); PA01-04 (c), 06-09, 11-12; PS01-05 (d)).


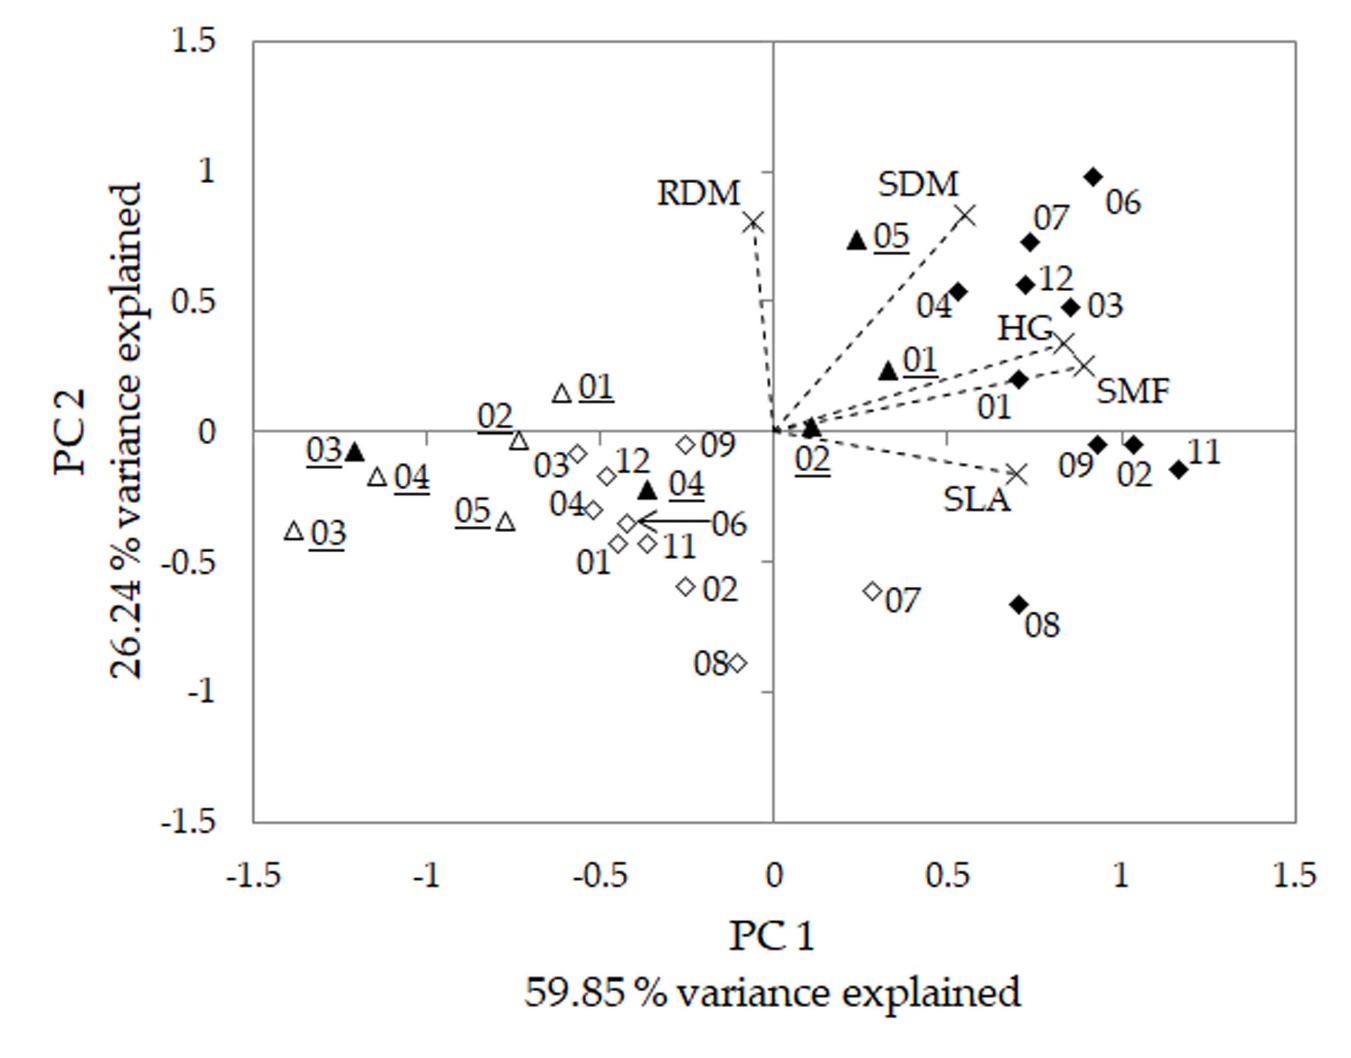


**Figure S2.** Biplot off the variables (**X**) and populations on the plane defined by the two Principal Components, for *P. patula* (♦) and *P. pseudostrobus (*▲). Full symbols and population’s number represent FC treatment while empty symbols and underlined population’s number represent DS treatment.
